# Supplementary material
Source: PubMed Central journal article supplement (PMC10228515)
Supplement: NIHMS1888502-supplement-Source_Data_Extended_Data_Figure5_1.pdf [file NIHMS1888502-supplement-Source_Data_Extended_Data_Figure5_1.pdf]

500 $\mu$ M IAA same as Extended Data Figure 1b

25 $\mu$ M IAA

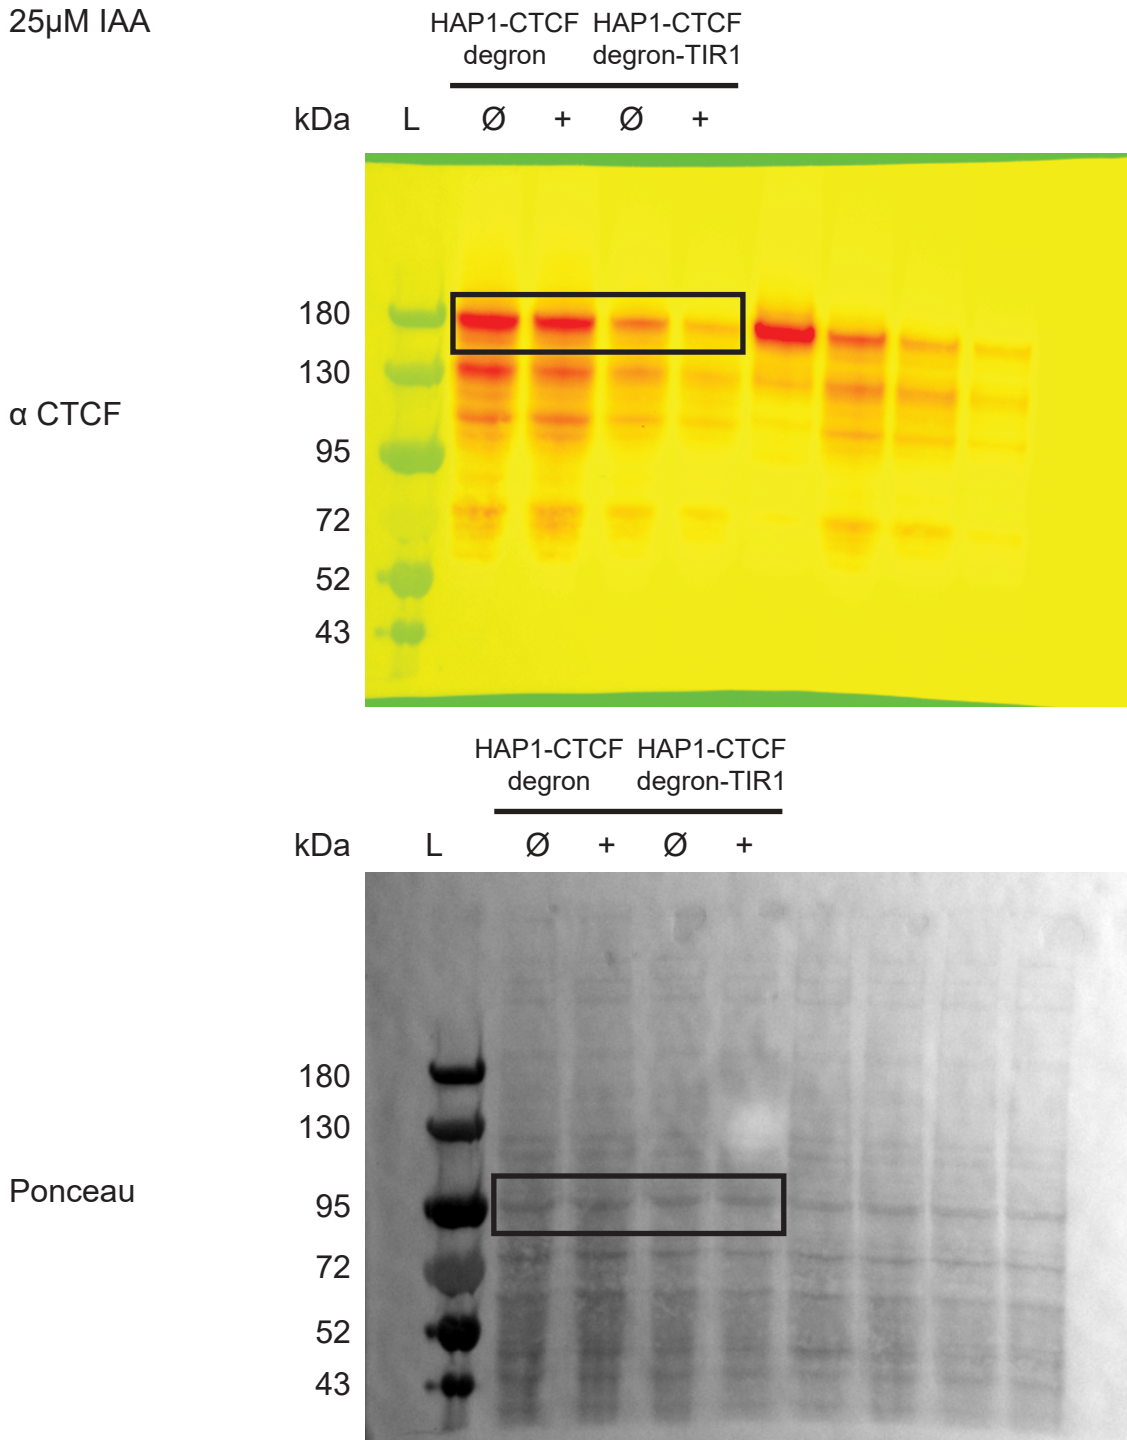

**Source Data for Extended Data Figure 5a: Unprocessed Western blot image**

Unprocessed images of western blots (red) shown in Extended Data Figure 5a overlaid with white epi illumination of PageRuler Prestained Protein Ladder (green).

Ponceau image was acquired with epi illumination.

Black rectangle on blots outlines the cropped sections shown in Extended Data Figure 5a.
