# Supplementary material
Source: PubMed Central journal article supplement (PMC10228515)
Supplement: NIHMS1888502-supplement-Source_Data_Extended_Data_Figure9_1.pdf [file NIHMS1888502-supplement-Source_Data_Extended_Data_Figure9_1.pdf]

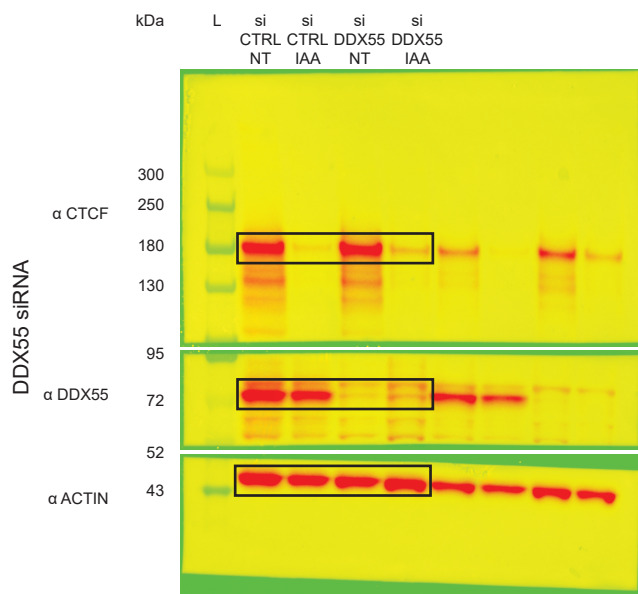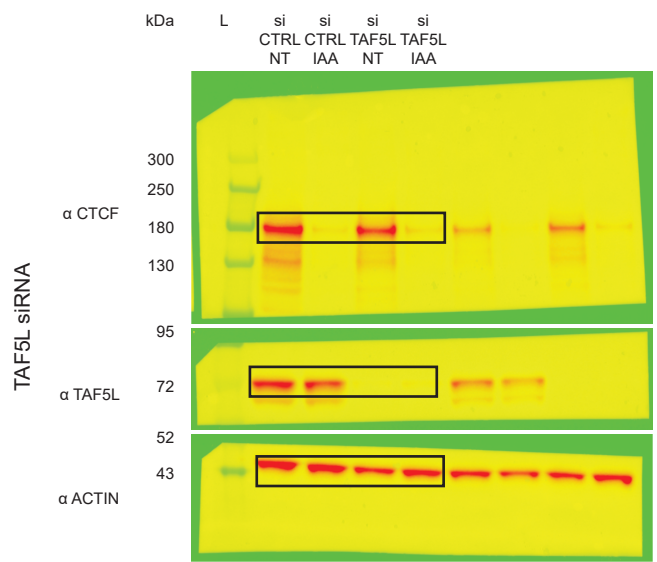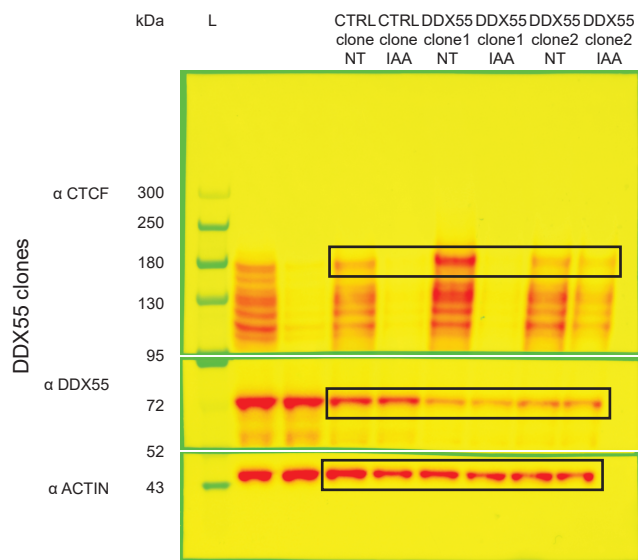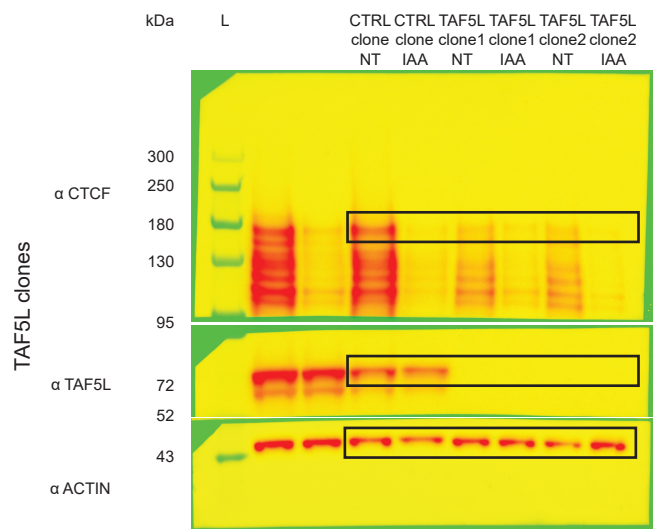

### Source Data for Extended Data Figure 9a: Unprocessed Western blot image

Unprocessed images of western blots (red) shown in Extended Data Figure 9a overlaid with white epi illumination of PageRuler Prestained Protein Ladder (green).

Prior to any probing, the membranes were physically cut into pieces.

Black rectangle on blots outlines the cropped sections shown in Extended Data Figure 9a.
